# Supplementary material for: Calendula officinalis—A Great Source of Plant Growth Promoting Endophytic Bacteria (PGPEB) and Biological Control Agents (BCA)
Source: MDPI journal article supplement (doi:10.3390/microorganisms11010206), 2023-01-13
Supplement: s1 [file s1]

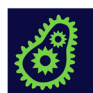

## Article

# *Calendula officinalis*—A great source of plant growth promoting endophytic bacteria (PGPEB) and biological control agents (BCA)

Polina C. Tsalgatidou <sup>1,2,\*</sup>, Eirini-Evangelia Thomloudi <sup>1</sup>, Kallimachos Nifakos <sup>1,2</sup>, Costas Delis <sup>2</sup>, Anastasia Venieraki <sup>3,\*</sup> and Panagiotis Katinakis <sup>1</sup>

<sup>1</sup> Laboratory of General and Agricultural Microbiology, Agricultural University of Athens, Iera Odos 75, 11855 Athens, Greece

<sup>2</sup> Department of Agriculture, University of the Peloponnese, 24100 Kalamata, Greece

<sup>3</sup> Laboratory of Plant Pathology, Agricultural University of Athens, Iera Odos 75, 11855 Athens, Greece

\* Correspondence: polina.tsalgatidou@go.uop.gr (P.C.T.); venieraki@aau.gr (A.V.)

## Supplementary Material

**Table S1.** Molecular identification of endophytic bacteria based on 16S rRNA gene sequence and their NCBI accession numbers.

| Strain     | Closest species based on 16S rRNA gene sequence<br>(Accession number) | % Identity | GenBank<br>Accession<br>Number |
|------------|-----------------------------------------------------------------------|------------|--------------------------------|
| Cal.r.29   | <i>Bacillus velezensis</i> CBMB205 (NR_116240.1)                      | 99.73      | MW267297                       |
| Cal.l.33   |                                                                       | 99.73      | MW266119                       |
| Cal.r.31.1 | <i>Bacillus mycoides</i> NBRC 101228 (NR_113990.1)                    | 99.46      | MW273495                       |
| Cal.r.17   |                                                                       | 99.46      | MW273439                       |
| Cal.r.19   | <i>Bacillus subtilis</i> BCRC 10255 (NR_116017.1)                     | 99.28      | MW266538                       |
| Cal.r.22   |                                                                       | 99.64      | MW267132                       |
| Cal.f.5    | <i>Bacillus proteolyticus</i> 4275 (MT544821.1)                       | 99.46      | MW267743                       |
| Cal.r.1    | <i>Bacillus proteolyticus</i> MCCC 1A00365 (NR_157735.1)              | 98.58      | MW267751                       |
| Cal.l.1    | <i>Bacillus proteolyticus</i> MCCC 1A00365 (NR_157735.1)              | 99.37      | MW267272                       |
| Cal.r.7    | <i>Bacillus cereus</i> ATCC 14579 (NR_074540.1)                       | 99.73      | MW267752                       |
| Cal.r.27   |                                                                       | 99.19      | MW268768                       |
| Cal.r.33   | <i>Bacillus megaterium</i> ATCC 14581 (NR_116873.1)                   | 99.28      | MW266394                       |
| Cal.r.28   |                                                                       | 99.02      | MW266126                       |

|            |                                                               |       |          |
|------------|---------------------------------------------------------------|-------|----------|
| Cal.f.2    |                                                               | 99.37 | MW266131 |
| Cal.r.11   |                                                               | 99.37 | MW271042 |
| Cal.l.11   |                                                               | 99.55 | MW269980 |
| Cal.l.21   |                                                               | 99.01 | MW273383 |
| Cal.l.30   |                                                               | 99.01 | MW273438 |
| Cal.l.20   | <i>Bacillus halotolerans</i> DSM 8802 (NR_115063.1)           | 99.28 | MW271029 |
| Cal.f.2.1  |                                                               | 99.10 | MW27292  |
| Cal.f.6.1  |                                                               | 99.82 | MW268769 |
| Cal.f.6.3  |                                                               | 99.19 | MW268770 |
| Cal.f.4    |                                                               | 99.73 | MW273370 |
| Cal.r.20   |                                                               | 98.73 | MW286788 |
| Cal.r.30   | <i>Pseudomonas frederiksbergensis</i> DSM 13022 (NR_117177.1) | 99.55 | MW287260 |
| Cal.r.38.1 |                                                               | 99.37 | MW287271 |
| Cal.r.21   |                                                               | 99.64 | MW288015 |
| Cal.r.37.1 | <i>Pseudomonas kilonensis</i> 520-20 (NR_028929.1)            | 99.64 | MW287272 |
| Cal.r.15   |                                                               | 99.64 | MW288016 |
| Cal.r.6    | <i>Pseudomonas koreensis</i> Ps 9-14 (NR_025228.1)            | 99.28 | MW286787 |
| Cal.r.3    |                                                               | 99.19 | MW286768 |
| Cal.l.6    | <i>Pseudomonas viridiflava</i> (NR_117825.1)                  | 99.73 | MW287322 |
| Cal.f.9    |                                                               | 99.73 | MW287324 |
| Cal.r.35   | <i>Rhizobium nepotum</i> 39/7 (NR_117203.1)                   | 99.62 | MW286763 |
| Cal.r.8.2  | <i>Stenotrophomonas rhizophila</i> e-p10 (NR_121739.1)        | 99.28 | MW287326 |
